# Supplementary material for: Protease resistance of porcine acidic mammalian chitinase under gastrointestinal conditions implies that chitin-containing organisms can be sustainable dietary resources
Source: PubMed Central journal article supplement (PMC5636921; doi:10.1038/s41598-017-13526-6), 2017-10-11
Supplement: 41598_2017_13526_MOESM1_ESM.pdf [file 41598_2017_13526_MOESM1_ESM.pdf]

## **Supplementary Information**

### **Protease resistance of porcine acidic mammalian chitinase under gastrointestinal conditions implies that chitin-containing organisms can be sustainable dietary resources**

Eri Tabata<sup>1</sup>, Akinori Kashimura<sup>1</sup>, Satoshi Wakita<sup>1</sup>, Misa Ohno<sup>1</sup>, Masayoshi Sakaguchi<sup>1</sup>, Yasusato Sugahara<sup>1</sup>, Yasutada Imamura<sup>1</sup>, Shiro Seki<sup>2</sup>, Hitoshi Ueda<sup>3</sup>, Vaclav Matoska<sup>4</sup>, Peter O. Bauer<sup>4,5</sup>, Fumitaka Oyama<sup>1</sup>

<sup>1</sup>Department of Chemistry and Life Science, Kogakuin University, Hachioji, Tokyo 192-0015, Japan, <sup>2</sup>Department of Environmental Chemistry, Kogakuin University, Hachioji, Tokyo 192-0015, Japan, <sup>3</sup>Department of Integrative Biology, Graduate School of Natural Science and Technology, Okayama University, Okayama 700-8530, Japan, <sup>4</sup>Laboratory of Molecular Diagnostics, Department of Clinical Biochemistry, Hematology and Immunology, Homolka Hospital, Roentgenova 37/2, Prague 150 00, Czech Republic, <sup>5</sup>Bioinova Ltd., Videnska 1083, Prague 142 20, Czech Republic

(a)

|        |       |                |       |       |                                        |         |     |       |       |
|--------|-------|----------------|-------|-------|----------------------------------------|---------|-----|-------|-------|
| AMCase | GAPDH | $\beta$ -actin | Pep A | Pep C | H <sup>+</sup> /K <sup>+</sup> -ATPase | Gastrin | Gif | Mucin | Chit1 |
|--------|-------|----------------|-------|-------|----------------------------------------|---------|-----|-------|-------|

(b)

TGACTTCACAGGCACCTTCTGCAACCAGGGCAAGTTCCCCCTGATCAACACCCTGAAGGATGCT  
CTTGGCCTGAATAGCACAAAGTTGCACCGACCTCCACTACATGGTCTACATGTTCCAGTATGATT  
CCACCCACGGCAAGTTCCACGGCACAGTCAAGGCGGAGAACGGGAAGCTTGTCATCTTCTAGGC  
GGACTGTTAGTTGCATTCCACCTTTTTCTTGACAAAACCTAACTTGCGCAGAAAAATGAGATGAG  
ATTGGCATGGCTGGATCCGGCGGCATCGATTCTTCTTACTACACAGGAAGCCTGAACTGGGTGC  
CTGTTTCCGTCGAGGGTTACTGGCAGATTACCTTGGACAGCATCACCGAGTTCCCTCAAGACCCA  
CAAGTACGACCCCGCCAGAGGTACCGCTTCGGCGACTTCAGCGTGGCCTTGAGCCCATGGCC  
TACTTGAAGCTGCCTACTTTGGCGAGATCAGCATCTGGGTTCACTGACTACTTCACGGCCAT  
GGCCAGGAGGGCTGGTTCCCACTGCTGTGTGTGGGGCTGCGGCCACAGTGGGAGAACCACCAC  
CTACAAGACGGACCGGTGGTCTCTTCTATTAACAATATCGCTGAAAATGTCAACCACAGGACGT  
ACTGGCAGTTTCTGAGTGGCCAAACGCCCTTAAACGAAGGAGTTGCGGAATGGATGGAGGAGGA  
AGAAGAAGCATATGGATGGATGGACTTCGGCCGCCGAGTGCTGAGGAAGGAGACCAGCGTCCCC  
TAGAACCAGCTCCAGACCACAACCTGAAGACACAGTTTGATCGGCTTAAAGCGGAAGCAGGCA  
CCTATAACCTGACCATCAGTGAAGTTAGTGTGATTGATGCACCATTTCCCTTCCCTGCTCAGCG  
GATCCGTCAACTCAGCCATCAGGTTTCTGCGCAAATATGGCTTTGATGGCCTTGACCTTG

**Figure S1. Single standard DNA molecule used for qPCR.** (a) Schematic representation of the standard DNA molecule. (b) Nucleotide sequence of the single standard DNA. The single standard DNA, 956 bases long, contained cDNA fragments of AMCase, GAPDH,  $\beta$ -actin, pepsinogen A (Pep A), pepsinogen C (Pep C), H<sup>+</sup>/K<sup>+</sup>-ATPase, Gastrin, gastric intrinsic factor (Gif), Mucin and Chit1 in a one-to-one ratio. Primers for qPCR in each target DNA region are shown in underline.

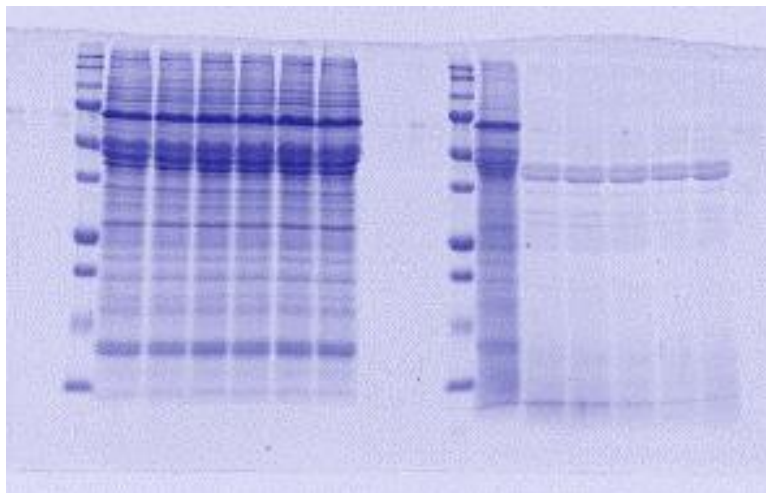

**Figure S2. Full-length gel image shown in Fig. 3a.** Full-length gel images of SDS-PAGE and CBB staining.

(a)

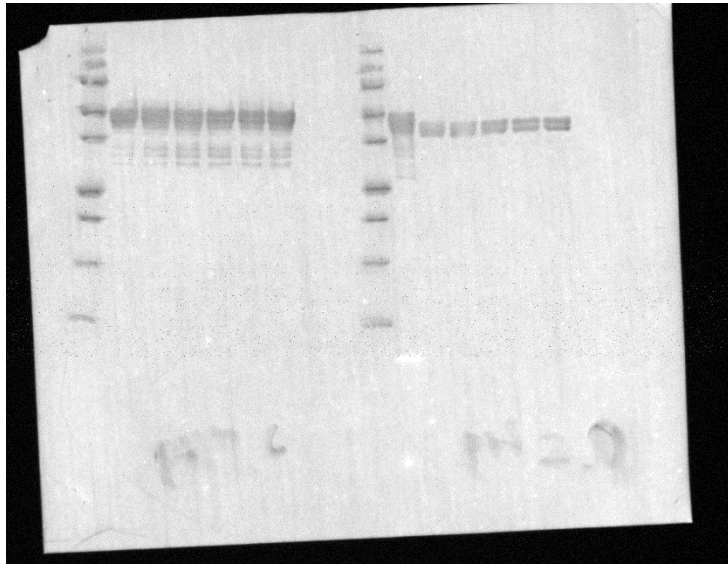

(b)

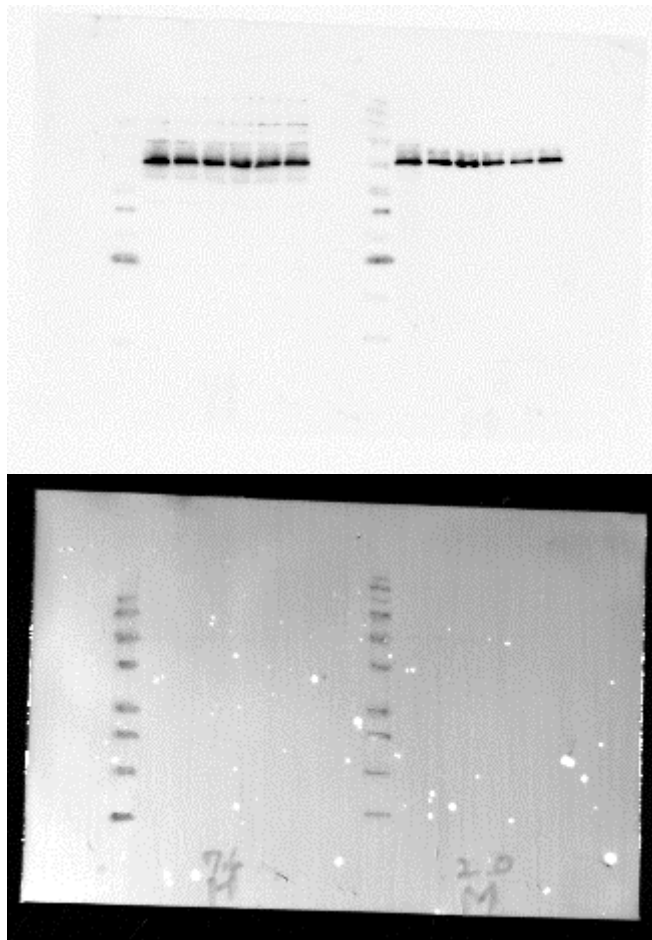

**Figure S3. Full-length gel and blots shown in Fig. 3b and c.** (a) Western blotting using anti-pepsin and molecular weight markers. (b) Western blotting using anti-AMCase and its molecular weight markers.

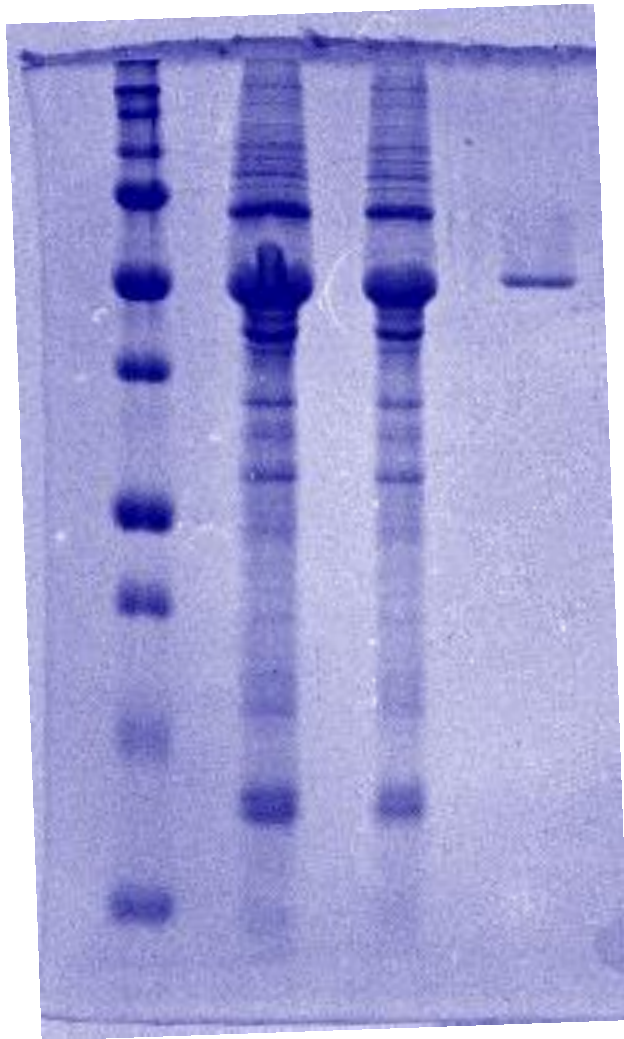

**Figure S4. Full-length gel image shown in Fig. 4.** Full-length gel image of SDS-PAGE and CBB staining.

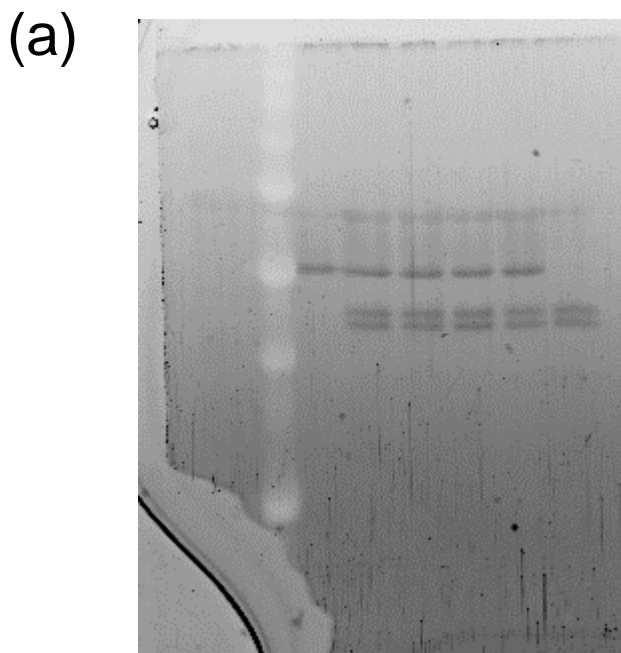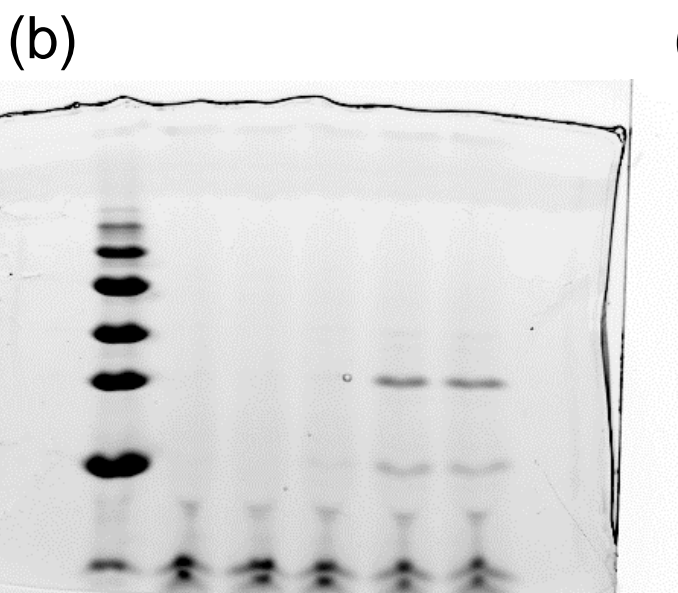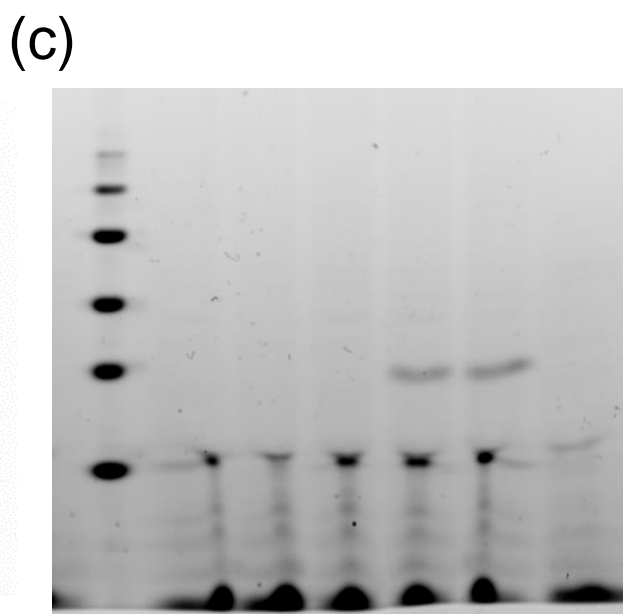

**Figure S5. Full-length gel and blots shown in Fig. 5.** (a) Full-length gel images of SDS-PAGE and SYPRO Ruby staining in Fig. 5a. (b and c) Full-length gel images of FACE methods in Fig. 5c and d.

(a)

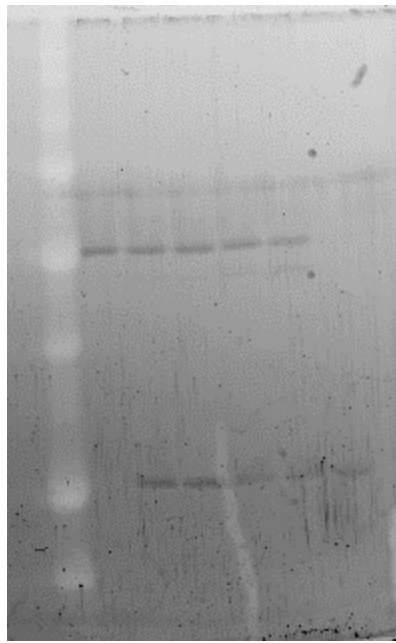

(b)

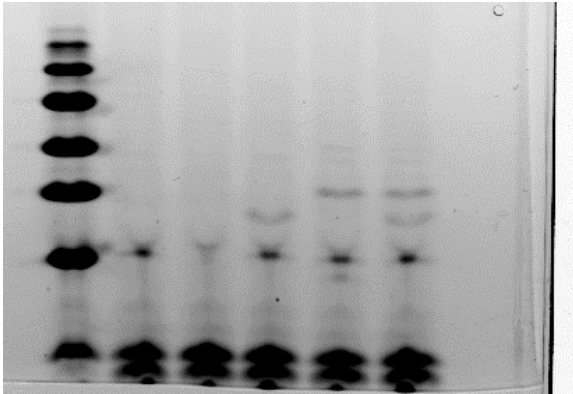

(d)

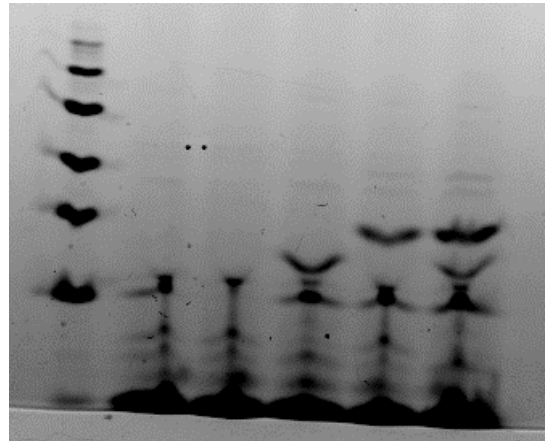

(c)

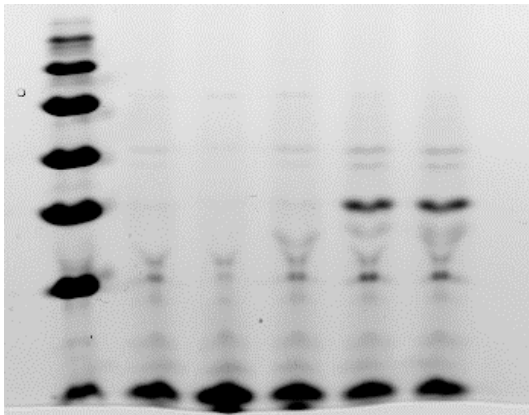

(e)

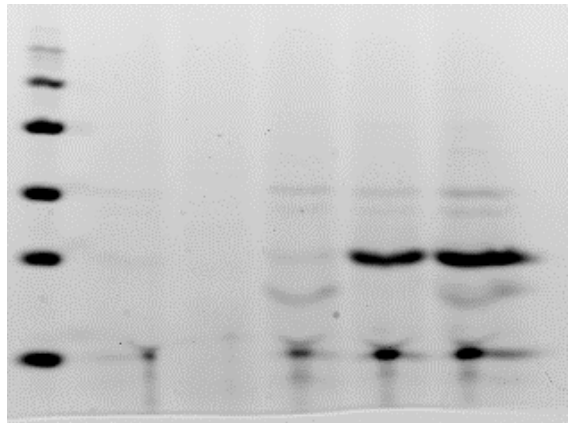

**Figure S6. Full-length gel and blots shown in Fig. 6.** (a) Full-length gel images of SDS-PAGE and SYPRO Ruby staining in Fig. 6a. (b-e) Full-length gel images of FACE methods in Fig. 6c-f.

(a)

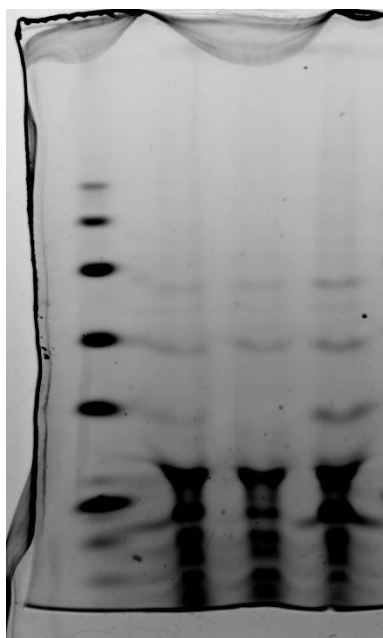

(b)

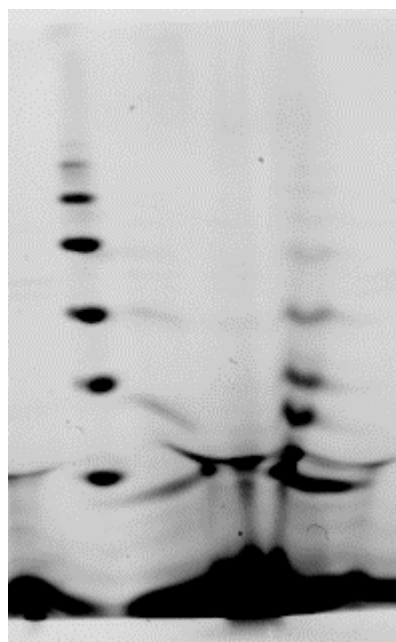

**Figure S7. Full-length gel and blots shown in Fig. 7. (a and b) Full-length gel images of FACE methods in Fig. 6a and b.**



**Table S1. List of qPCR primers.**

| <b>Gene</b>                            | <b>Forward primer</b>  | <b>Reverse primer</b> |
|----------------------------------------|------------------------|-----------------------|
| AMCase                                 | TGACTTCACAGGCACTTTCT   | CGGTGCAACTTGTGCTATTC  |
| GAPDH                                  | ACCTCCACTACATGGTCTACA  | ATGACAAGCTTCCCGTTCTC  |
| $\beta$ -actin                         | CTTCTAGGCGGACTGTTAGTTG | AGCCATGCCAATCTCATCTC  |
| Pepsinogen A                           | GGCGGCATCGATTCTTCTTA   | ATTACCTTGGACAGCATCACC |
| Pepsinogen C                           | GAGTTCCTCAAGACCCACAAG  | GATGCTGATCTCGCCAAAGTA |
| H <sup>+</sup> /K <sup>+</sup> -ATPase | CTGGGTTCACTGACTACTTCAC | GAGAACCACCACCTACAAGAC |
| Gastrin                                | GGACCGGTGGTCTCTTCTATTA | TCCGCAACTCCTTCGTTTAAG |
| Gif                                    | ATGGATGGAGGAGGAAGAAGA  | TCTGGAGCTCGGTTCTAGG   |
| Mucin                                  | CCACAACCTGAAGACACAGT   | GCTGAGCAGAGGAAGGAAAT  |
| Chit1                                  | GTCAACTCAGCCATCAGGTT   | CAAGGTCAAGGCCATCAAA   |
